# Supplementary material for: " Mamola " como topónimo
Source: Royal Society of Chemistry journal article supplement (doi:10.1039/d3sc04653b), 1977-01-01
Supplement: d3sc04653b2.pdf [file d3sc04653b2.pdf]

# Supporting Information: Sample Efficient Reinforcement Learning with Active Learning for Molecular Design

Michael Dodds<sup>1</sup>, Jeff Guo<sup>1</sup>, Thomas Löhr<sup>1</sup>, Alessandro Tibo<sup>1</sup>, Ola Engkvist<sup>1</sup>, Jon Paul Janet<sup>1</sup>

<sup>1</sup>: Molecular AI, Discovery Sciences, R&D, AstraZeneca, 431 50 Gothenburg, Sweden

## Contents

|                                                                                     |    |
|-------------------------------------------------------------------------------------|----|
| Supporting Text .....                                                               | 4  |
| Supporting Text 1 Hardware.....                                                     | 4  |
| Supporting Text 2. Retrospective REINVENT Analysis .....                            | 4  |
| Supporting Text 3. Machine Learning Models .....                                    | 4  |
| Supporting Text 4. Training Window Size.....                                        | 6  |
| Supporting Tables .....                                                             | 8  |
| Supporting Table 1. Experimental Parameters for RL-AL Optimisation.....             | 8  |
| Supporting Table 2. SM Predictive Error Dependent on Training Data. ....            | 10 |
| Supporting Table 3. Grid Search for RL-AL Parameters.....                           | 11 |
| Supporting Table 4. SMARTS Patterns Compromising Custom Alerts. ....                | 13 |
| Supporting Table 5 RDKit Descriptors .....                                          | 15 |
| Supporting Figures.....                                                             | 17 |
| Supporting Figure 1. Reinforcement Learning and Virtual Screen Hit Efficiency ..... | 17 |
| Supporting Figure 2. Multi-parameter Score for RL, RL-AL, and VS.....               | 18 |
| Supporting Figure 3. Compound Score and Distribution with Training Epochs.....      | 19 |
| Supporting Figure 4. Predictive Accuracy on Retrospective Data. ....                | 20 |
| Supporting Figure 5. Effect of Gaussian Noise on Run Productivity.....              | 21 |
| Supporting Figure 6. Confidence Adapted Weights. ....                               | 22 |
| Supporting Figure 7. Acquisition Strategies for RL-AL. ....                         | 23 |
| Supporting Figure 8 Training Pool Manipulation. ....                                | 24 |

|                                                                                                        |    |
|--------------------------------------------------------------------------------------------------------|----|
| Supporting Figure 9. Molecular Featurisation for RL-AL. ....                                           | 25 |
| Supporting Figure 10. UMAP of Hits for Optimised Conditions.....                                       | 26 |
| Supporting Figure 11. Generation without Experience Replay and Diversity Filters .....                 | 27 |
| Supporting Figure 12. Example structures generated by MPO-based and optimized RL-AL interventions..... | 28 |
| Supporting Figure 13. Visualization of ROCs overlays and docked poses from RL-AL ...                   | 29 |
| Supporting Figure 14 Model Error with Retrospective RL.....                                            | 30 |
| Supporting Figure 15. Model and Fingerprint Cross-validation.....                                      | 32 |
| Supporting Figure 16. Hyperparameter stability comparison.....                                         | 33 |
| Supporting Figure 17. Sampling Size Dependent MPO Convergence. ....                                    | 34 |
| References .....                                                                                       | 35 |

## Supporting Text

### Supporting Text 1 Hardware

Time comparison experiments were run on the following hardware & software specifications:

- Intel(R) Xeon(R) W-2225 CPU @ 4.10GHz
- Nvidia GeForce RTX 3080 Ti
- Linux Distro: CentOS Linux release 7.9.2009 (Core)
- RDKit version 2020.03.3.0
- scikit-learn version 0.21.3
- TensorFlow version 1.15.2

### Supporting Text 2. Retrospective REINVENT Analysis

A total of 64 000 labelled compounds were amassed over 500 epochs (denoted as  $e$ ) using the REINVENT framework in conjunction with AutoDock-Vina, thereby constituting dataset  $D$  encompassing elements  $e_0, e_1, e_2, \dots, e_{500}$ . For each epoch, executed in chronological sequence, a machine learning model was trained on the  $m$  most recently acquired compounds, with  $m$  being either 100, 1 000, or 5 000.

We assessed the look-forward predictive accuracy of various methods, including Support Vector Regression (SVR), ChemProp, and Random Forest, on the retrospective dataset (refer to Supporting Figure 3) by Root Mean Square Error (RMSE). Model hyperparameters were optimised by grid search and five-fold cross-validation error on 100, 1 000, and 5 000 compounds sampled from retrospective dataset  $D \cup (e_{280} \dots e_{300})$ .

### Supporting Text 3. Machine Learning Models

**Gradient Boosted Decision Trees** For this task we use XGBoost's<sup>1</sup> implementation of the boosted trees regressor. XGboost sequentially constructs trees which optimise the loss function, here derived as an average of the previous trees prediction accuracy (MSE), plus a regularization term based on tree complexity. This leads to the production of a 'forest' of

weak learners which intuitively place increased importance on features with a high prediction error for previous trees.

**K-Nearest Neighbours**<sup>2</sup> (KNN). We allow selection of scikit-learn's implementation of KNN. KNN's calculates the Euclidean distance between points and predicts a label value based on the labels for the top K most similar points. In the case of regression, the mean value.

**Support Vector Machines**<sup>3</sup>. A support vector regression algorithm using a radial basis function kernel was implemented using scikit-learn. SVR's operate by finding a boundary of separation between classes of datapoints which maximises the "margin", the distance between the boundary and the datapoints. Data can be transformed into high dimensionality space using the kernel trick, computed as the inner product between two data points in the transformed space. In the case of RBF this relationship decays with distance (gamma) and provides a means to evaluating the non-linear similarity between two points. The parameters C, regularisation parameter, and gamma, the kernel coefficient for the radial basis function were optimised using five-fold cross-validation with accuracy measured as MSE.

**Gaussian Process**<sup>4</sup> A gaussian process using a radial basis function kernel was implemented using scikit-learn<sup>5</sup>. A gaussian process is another kernel-based method, which utilises the covariance of training data to compute a joint-probability distribution of functions which can be sampled for the most probable value at a given point. The construction of a joint-probability distribution allows for direct quantification of model uncertainty in any given prediction. Kernel methods scale quadratically with data size due to computation of matrix inversions. A radial bias function kernel was used to compute the absolute distance between inputs. Target values were scaled using scikit-learn's internal method, `normalize_y` which removed then mean and then scaled to unit variance. The length scale and regularization strength were computed using scikit-learn's internal optimiser function, `LMBFGS`, to search for kernel parameters that maximise the log-marginal likelihood.

**Graph Neural Network.** We employed ChemProp's <sup>6</sup> implementation of a Graph Neural Network for molecular property prediction. The model uses bond-centered convolutions to learn a vector representation of the molecule graph that maximizes the predictive accuracy of a feed-forward neural network. Global features derived from RDKit's physchem library were concatenated prior to training. We used ChemProp's internal optimisation function, to select the best hyperparameters based on the retrospective dataset. Which optimizes the following parameters: batch size, feed forward network hidden layer size and number, depth.

**Uniform Manifold Approximation and Projection.** We employ a non-linear dimensionality reduction technique from the UMAP-learn python library<sup>7</sup> that seeks to represent the geometric structure of data in a lower-dimensionality space. As a first step UMAP constructs a high-dimensional graph representation. It computes the space between each point in this space using the K nearest neighbours' algorithm. Subsequently there is a construction of a fuzzy simplicial complex, a type of weighted graph, which captures both the local and global structure of the data. The graph is then optimised using stochastic gradient descent to minimise the differences between high dimensional and low dimensional representations, measured by cross-entropy. The result of which is an embedding which can be used for the projection of linear and non-linear data into two-dimensions.

#### **Supporting Text 4. Training Window Size**

We consider the impact of retaining various numbers of observations in the training pool via a sliding window scheme where the model is retrained on  $m$  most recently acquired oracle labels. The molecules generated in each epoch are from the same distribution, with the most recent epochs being most similar and historical epochs being less relevant for future epochs. This effect can be dramatic as the RL process directly optimizes the oracle score, meaning that the balance between low- and high-scoring molecules shifts substantially, for example from a hit rate in the first 10 000 oracles of 0.02 and 0.07% (for ROCs and docking respectively) to a hit rate of 0.23 and 0.2% in between 20 000 - 30 000 oracle calls in the Motivating Example (Section 2). By retaining a smaller set of relevant training data, we

accelerate surrogate training times at the expense of potentially lower coverage. We experiment with training window sizes of 100, 1 000, 5 000 and 10 000 molecules. We also explored an alternative AL paradigm, adaptive subsampling<sup>8</sup>, which attempt to improve model generalizability and accuracy by iteratively constructing a 1 000-compound training set based on model confidence in 10 steps (**Supporting Figure 8**).

Using the smallest training window sizes resulted in less accurate surrogate models, with the model with a 100-molecule window achieving a look-ahead MAE of  $0.065\pm 0.008$  vs  $0.051\pm 0.005$  for the baseline case with 1 000 which translates into identifying only  $113\pm 37$  hit scaffolds vs  $147\pm 13$  for the run with 1 000. However, the returns are rapidly diminishing, with a training pool of 1 000 being sufficient to generate 82% of the hit scaffolds compared to a training pool of 10 000 and no significant benefit observed from keeping all molecules ( $144\pm 13$  for 10 000 vs  $143\pm 13$  for keeping all) hit scaffolds found. In contrast, training times for 100, 1 000 and 10 000 compounds are approximately 0.5, 1.7 and 25.5 seconds (Methods for hardware information), reducing the real-world efficiency of models with larger training batches. In terms of diversity, there is no clear impact of varying surrogate model training window size with all approaches being comparable.

## Supporting Tables

**Supporting Table 1. Experimental Parameters for RL-AL Optimisation.**

In the table we show each experimental condition that was modified during the optimisation of the RL-AL parameters. In the RL-AL Experiments selection, the ‘default’ config is highlighted in bold, and each row represents an experiment in which a single parameter was altered relative to the default. Double asterisked experiments indicate that they were performed for both oracles, ADV and ROCS.

|                                    | <b>RL Baseline **</b> | <b>RL-AL Naive **</b> | <b>Gaussian Noise **</b> | <b>RL-AL Experiments</b>         |
|------------------------------------|-----------------------|-----------------------|--------------------------|----------------------------------|
| <b><i>Surrogate Model</i></b>      | Random Forest         | Random Forest         | Random Forest            | <b>Random Forest</b>             |
| <b><i>Representation</i></b>       | Physchem              | Physchem              | Physchem                 | <b>Physchem &amp; ECFP</b>       |
| <b><i>Acquisition Function</i></b> | UCB                   | UCB                   | UCB                      | Greedy & <b>UCB</b> & Random     |
| <b><i>Confidence Scaling</i></b>   | 1                     | 1                     | 1                        | <b>0, 1</b>                      |
| <b><i>Drop Duplicates</i></b>      | FALSE                 | TRUE                  | FALSE                    | <b>TRUE</b>                      |
| <b><i>Gaussian Noise</i></b>       | 0                     | 0                     | 0.0 - 0.2 *              | <b>0</b>                         |
| <b><i>SM Pred. Weights</i></b>     | N/A                   | 1                     | N/A                      | <b>0.0, 0.25, 0.75 &amp; 1.0</b> |



|                                  |       |       |       |                                            |
|----------------------------------|-------|-------|-------|--------------------------------------------|
| <b><i>Training Pool Size</i></b> | None  | 1000  | 1000  | 100, <b>1 000</b> , 5 000,<br>10 000 & inf |
| <b><i>Num. Loops</i></b>         | 1     | 1     | 1     | <b>1</b> , 2, 4 & 8                        |
| <b><i>N_batch</i></b>            | 128   | 256   | 128   | <b>256</b> , 1024, 2048                    |
| <b><i>N_acquired</i></b>         | 128   | 128   | 128   | 32, 64, <b>128</b>                         |
| <b><i>MPO Acquisition</i></b>    | FALSE | FALSE | FALSE | True & <b>False</b>                        |
|                                  |       |       |       |                                            |

**Supporting Table 2. SM Predictive Error Dependent on Training Data.**

Using the RL-AL system established in the main text, we measure the predictive accuracy of the surrogate model for different quantities of training data by calculating the RMSE of predicted values to true values over an RL-AL run lasting 30,000 oracle calls.

| Experiment           | RMSE   | Std. Dev. |
|----------------------|--------|-----------|
| Training Pool 100    | 0.0645 | 0.0083    |
| Training Pool 1 000  | 0.0514 | 0.0053    |
| Training Pool 5 000  | 0.0459 | 0.0045    |
| Training Pool 10 000 | 0.0446 | 0.0049    |
| Training Pool 30 000 | 0.0443 | 0.0053    |

### Supporting Table 3. Grid Search for RL-AL Parameters.

This table shows a grid search over three conditions in RL-AL,  $N_{batch}$ ,  $N_{acq}$  and  $N_{loops}$ , plotted in the other columns are the mean and standard deviation, for the cumulative number of favourable scaffolds, hits and the average Tanimoto score for the pairwise distribution of all hits for all runs.

| Parameters |         |          | Fav. Scaffolds |           | Hits  |           | Tanimoto |           |
|------------|---------|----------|----------------|-----------|-------|-----------|----------|-----------|
| N. Batch   | N. Acq. | N. Loops | Mean           | Std. Dev. | Mean  | Std. Dev. | Mean     | Std. Dev. |
| 256        | 32      | 8        | 390            | 36        | 9974  | 1694      | 0.23     | 0.02      |
| 256        | 32      | 4        | 413            | 183       | 9298  | 2611      | 0.243    | 0.015     |
| 256        | 32      | 2        | 211            | 64        | 8409  | 1157      | 0.263    | 0.027     |
| 256        | 32      | 1        | 582            | 252       | 11204 | 2727      | 0.255    | 0.022     |
| 256        | 64      | 8        | 703            | 65        | 8943  | 571       | 0.23     | 0.018     |
| 256        | 64      | 4        | 445            | 118       | 7918  | 527       | 0.22     | 0.009     |
| 256        | 64      | 2        | 626            | 170       | 8715  | 1005      | 0.257    | 0.016     |
| 256        | 64      | 1        | 624            | 101       | 9755  | 806       | 0.224    | 0.026     |
| 256        | 128     | 16       | 148            | 20        | 780   | 172       | 0.196    | 0.009     |
| 256        | 128     | 8        | 149            | 13        | 839   | 89        | 0.201    | 0.012     |
| 256        | 128     | 4        | 150            | 17        | 860   | 129       | 0.195    | 0.005     |
| 256        | 128     | 2        | 142            | 18        | 749   | 114       | 0.197    | 0.012     |
| 256        | 128     | 1        | 142            | 23        | 716   | 138       | 0.199    | 0.016     |
| 256        | 128     | 1        | 146            | 13        | 849   | 186       | 0.213    | 0.017     |
| 256        | 128     | 1        | 156            | 8         | 928   | 170       | 0.191    | 0.003     |
| 256        | 128     | 1        | 146            | 13        | 849   | 186       | 0.213    | 0.017     |
| 512        | 32      | 8        | 303            | 72        | 7526  | 732       | 0.268    | 0.031     |
| 512        | 32      | 4        | 690            | 31        | 11153 | 3139      | 0.264    | 0.009     |
| 512        | 32      | 2        | 521            | 17        | 10988 | 1130      | 0.267    | 0.009     |
| 512        | 32      | 1        | 393            | 102       | 10457 | 1889      | 0.247    | 0.033     |
| 512        | 64      | 8        | 703            | 142       | 13324 | 1448      | 0.277    | 0.026     |
| 512        | 64      | 4        | 625            | 127       | 11996 | 664       | 0.253    | 0.017     |
| 512        | 64      | 2        | 699            | 106       | 11594 | 672       | 0.251    | 0.018     |

|      |     |    |     |     |       |      |       |       |
|------|-----|----|-----|-----|-------|------|-------|-------|
| 512  | 64  | 1  | 685 | 49  | 12141 | 689  | 0.264 | 0.025 |
| 512  | 128 | 16 | 329 | 41  | 4430  | 1087 | 0.204 | 0.016 |
| 512  | 128 | 8  | 359 | 19  | 4300  | 157  | 0.234 | 0.011 |
| 512  | 128 | 4  | 361 | 55  | 4178  | 389  | 0.203 | 0.008 |
| 512  | 128 | 2  | 371 | 49  | 3933  | 498  | 0.221 | 0.012 |
| 512  | 128 | 1  | 333 | 40  | 3481  | 405  | 0.224 | 0.02  |
| 1024 | 32  | 8  | 623 | 201 | 12156 | 2516 | 0.259 | 0.036 |
| 1024 | 32  | 4  | 437 | 267 | 10704 | 2280 | 0.271 | 0.016 |
| 1024 | 32  | 2  | 520 | 179 | 10011 | 3511 | 0.295 | 0.013 |
| 1024 | 32  | 1  | 406 | 185 | 9876  | 2868 | 0.275 | 0.022 |
| 1024 | 64  | 8  | 676 | 44  | 13207 | 816  | 0.248 | 0.022 |
| 1024 | 64  | 4  | 496 | 98  | 10953 | 2102 | 0.239 | 0.02  |
| 1024 | 64  | 2  | 668 | 244 | 13868 | 832  | 0.263 | 0.009 |
| 1024 | 64  | 1  | 796 | 229 | 13010 | 2301 | 0.247 | 0.025 |
| 1024 | 128 | 16 | 609 | 62  | 9597  | 764  | 0.271 | 0.023 |
| 1024 | 128 | 8  | 507 | 44  | 9760  | 458  | 0.263 | 0.018 |
| 1024 | 128 | 4  | 502 | 100 | 8869  | 2014 | 0.246 | 0.022 |
| 1024 | 128 | 2  | 557 | 33  | 8864  | 750  | 0.247 | 0.032 |
| 1024 | 128 | 1  | 522 | 67  | 8774  | 700  | 0.256 | 0.01  |
| 1024 | 128 | 1  | 358 | 54  | 6207  | 496  | 0.228 | 0.02  |
| 2048 | 32  | 8  | 376 | 221 | 10664 | 2380 | 0.26  | 0.014 |
| 2048 | 32  | 4  | 649 | 546 | 11810 | 3459 | 0.261 | 0.023 |
| 2048 | 32  | 2  | 470 | 156 | 11096 | 3188 | 0.297 | 0.019 |
| 2048 | 32  | 1  | 432 | 163 | 10751 | 2260 | 0.261 | 0.018 |
| 2048 | 64  | 8  | 486 | 167 | 12618 | 2918 | 0.235 | 0.016 |
| 2048 | 64  | 4  | 673 | 66  | 14237 | 280  | 0.271 | 0.011 |
| 2048 | 64  | 2  | 715 | 97  | 14570 | 722  | 0.267 | 0.007 |
| 2048 | 64  | 1  | 656 | 144 | 13878 | 1338 | 0.261 | 0.022 |
| 2048 | 128 | 8  | 647 | 87  | 12809 | 791  | 0.284 | 0.008 |
| 2048 | 128 | 4  | 595 | 51  | 12761 | 658  | 0.282 | 0.003 |
| 2048 | 128 | 2  | 572 | 69  | 11305 | 1121 | 0.275 | 0.017 |
| 2048 | 128 | 1  | 537 | 67  | 10771 | 1323 | 0.252 | 0.032 |

**Supporting Table 4. SMARTS Patterns Compromising Custom Alerts.**

SMILES arbitrary target specification is a language-based method for specifying structural motifs in compounds. Here we use it to identify and penalise compounds containing undesirable structural patterns. These patterns were identified as being commonly exploited by REINVENT or being unsuitable for pharmacological agents, the list below was provided by Janet, Jon Paul.

| <b>SMARTS Pattern</b> | <b>Description</b>      |
|-----------------------|-------------------------|
| [*;r7]                | Contains 7 Member Ring  |
| [*;r8]                | Contains 8 Member Ring  |
| [*;r9]                | Contains 9 Member Ring  |
| [*;r10]               | Contains 10 Member Ring |
| [*;r11]               | Contains 11 Member Ring |
| [*;r12]               | Contains 12 Member Ring |
| [*;r13]               | Contains 13 Member Ring |
| [*;r14]               | Contains 14 Member Ring |
| [*;r15]               | Contains 15 Member Ring |
| [*;r16]               | Contains 16 Member Ring |
| [*;r17]               | Contains 17 Member Ring |
| [#8][#8]              | Contains Peroxide       |

|                         |                                          |
|-------------------------|------------------------------------------|
| [#6;+]                  | Positive Charged Carbon                  |
| [#16][#16]              | Contains Disulfide                       |
| [#7;!n][S;!\$(S(=O)=O)] | Nitrogen Bonded Sulphur not in Sulphonyl |
| [#7;!n][#7;!n]          | Nitrogen to Nitrogen Single Bond         |
| C#C                     | Alkyne                                   |
| C=N                     | Imine                                    |
| C(=[O,S])[O,S]          | Carboxylic or Sulfonic Acid              |

## Supporting Table 5 RDKit Descriptors

A full list of the short names for the RDKit physiochemical descriptors library. Descriptors were used to enumerate compound features from SMILES strings. Features which were invariant across all sampled SMILES were dropped prior to model training.

|    |                     |    |              |     |                          |     |                         |
|----|---------------------|----|--------------|-----|--------------------------|-----|-------------------------|
| 0  | MaxAbsEStateIndex   | 52 | PEOE_VSA2    | 104 | FractionCSP3             | 156 | fr_azo                  |
| 1  | MaxEStateIndex      | 53 | PEOE_VSA3    | 105 | HeavyAtomCount           | 157 | fr_barbitur             |
| 2  | MinAbsEStateIndex   | 54 | PEOE_VSA4    | 106 | NHOHCount                | 158 | fr_benzene              |
| 3  | MinEStateIndex      | 55 | PEOE_VSA5    | 107 | NOCCount                 | 159 | fr_benzodiazepine       |
| 4  | qed                 | 56 | PEOE_VSA6    | 108 | NumAliphaticCarbocycles  | 160 | fr_bicyclic             |
| 5  | MolWt               | 57 | PEOE_VSA7    | 109 | NumAliphaticHeterocycles | 161 | fr_diazo                |
| 6  | HeavyAtomMolWt      | 58 | PEOE_VSA8    | 110 | NumAliphaticRings        | 162 | fr_dihydropyridine      |
| 7  | ExactMolWt          | 59 | PEOE_VSA9    | 111 | NumAromaticCarbocycles   | 163 | fr_epoxide              |
| 8  | NumValenceElectrons | 60 | SMR_VSA1     | 112 | NumAromaticHeterocycles  | 164 | fr_ester                |
| 9  | NumRadicalElectrons | 61 | SMR_VSA10    | 113 | NumAromaticRings         | 165 | fr_ether                |
| 10 | MaxPartialCharge    | 62 | SMR_VSA2     | 114 | NumHAcceptors            | 166 | fr_furan                |
| 11 | MinPartialCharge    | 63 | SMR_VSA3     | 115 | NumHDonors               | 167 | fr_guanido              |
| 12 | MaxAbsPartialCharge | 64 | SMR_VSA4     | 116 | NumHeteroatoms           | 168 | fr_halogen              |
| 13 | MinAbsPartialCharge | 65 | SMR_VSA5     | 117 | NumRotatableBonds        | 169 | fr_hdrzine              |
| 14 | FpDensityMorgan1    | 66 | SMR_VSA6     | 118 | NumSaturatedCarbocycles  | 170 | fr_hdrzone              |
| 15 | FpDensityMorgan2    | 67 | SMR_VSA7     | 119 | NumSaturatedHeterocycles | 171 | fr_imidazole            |
| 16 | FpDensityMorgan3    | 68 | SMR_VSA8     | 120 | NumSaturatedRings        | 172 | fr_imide                |
| 17 | BCUT2D_MWHI         | 69 | SMR_VSA9     | 121 | RingCount                | 173 | fr_isocyan              |
| 18 | BCUT2D_MWLOW        | 70 | SlogP_VSA1   | 122 | MolLogP                  | 174 | fr_isothiocyan          |
| 19 | BCUT2D_CHGHI        | 71 | SlogP_VSA10  | 123 | MolMR                    | 175 | fr_ketone               |
| 20 | BCUT2D_CHGLO        | 72 | SlogP_VSA11  | 124 | fr_Al_COO                | 176 | fr_ketone_Topless       |
| 21 | BCUT2D_LOGPHI       | 73 | SlogP_VSA12  | 125 | fr_Al_OH                 | 177 | fr_lactam               |
| 22 | BCUT2D_LOGPLOW      | 74 | SlogP_VSA2   | 126 | fr_Al_OH_noTert          | 178 | fr_lactone              |
| 23 | BCUT2D_MRHI         | 75 | SlogP_VSA3   | 127 | fr_ArN                   | 179 | fr_methoxy              |
| 24 | BCUT2D_MRLOW        | 76 | SlogP_VSA4   | 128 | fr_Ar_COO                | 180 | fr_morpholine           |
| 25 | AvgIpc              | 77 | SlogP_VSA5   | 129 | fr_Ar_N                  | 181 | fr_nitrile              |
| 26 | BalabanJ            | 78 | SlogP_VSA6   | 130 | fr_Ar_NH                 | 182 | fr_nitro                |
| 27 | BertzCT             | 79 | SlogP_VSA7   | 131 | fr_Ar_OH                 | 183 | fr_nitro_ arom          |
| 28 | Chi0                | 80 | SlogP_VSA8   | 132 | fr_COO                   | 184 | fr_nitro_ arom_nonortho |
| 29 | Chi0n               | 81 | SlogP_VSA9   | 133 | fr_COO2                  | 185 | fr_nitroso              |
| 30 | Chi0v               | 82 | TPSA         | 134 | fr_C_O                   | 186 | fr_oxazole              |
| 31 | Chi1                | 83 | EState_VSA1  | 135 | fr_C_O_noCOO             | 187 | fr_oxime                |
| 32 | Chi1n               | 84 | EState_VSA10 | 136 | fr_C_S                   | 188 | fr_para_hydroxylation   |
| 33 | Chi1v               | 85 | EState_VSA11 | 137 | fr_HOCCN                 | 189 | fr_phenol               |
| 34 | Chi2n               | 86 | EState_VSA2  | 138 | fr_Imine                 | 190 | fr_phenol_noOrthoHbond  |
| 35 | Chi2v               | 87 | EState_VSA3  | 139 | fr_NH0                   | 191 | fr_phos_acid            |

|    |               |     |              |     |                    |     |                   |
|----|---------------|-----|--------------|-----|--------------------|-----|-------------------|
| 36 | Chi3n         | 88  | EState_VSA4  | 140 | fr_NH1             | 192 | fr_phos_ester     |
| 37 | Chi3v         | 89  | EState_VSA5  | 141 | fr_NH2             | 193 | fr_piperdine      |
| 38 | Chi4n         | 90  | EState_VSA6  | 142 | fr_N_O             | 194 | fr_piperzine      |
| 39 | Chi4v         | 91  | EState_VSA7  | 143 | fr_Ndealkylation1  | 195 | fr_priamide       |
| 40 | HallKierAlpha | 92  | EState_VSA8  | 144 | fr_Ndealkylation2  | 196 | fr_prisulfonamd   |
| 41 | Ipc           | 93  | EState_VSA9  | 145 | fr_Nhpyrrole       | 197 | fr_pyridine       |
| 42 | Kappa1        | 94  | VSA_EState1  | 146 | fr_SH              | 198 | fr_quatN          |
| 43 | Kappa2        | 95  | VSA_EState10 | 147 | fr_aldehyde        | 199 | fr_sulfide        |
| 44 | Kappa3        | 96  | VSA_EState2  | 148 | fr_alkyl_carbamate | 200 | fr_sulfonamd      |
| 45 | LabuteASA     | 97  | VSA_EState3  | 149 | fr_alkyl_halide    | 201 | fr_sulfone        |
| 46 | PEOE_VSA1     | 98  | VSA_EState4  | 150 | fr_allylic_oxid    | 202 | fr_term_acetylene |
| 47 | PEOE_VSA10    | 99  | VSA_EState5  | 151 | fr_amide           | 203 | fr_tetrazole      |
| 48 | PEOE_VSA11    | 100 | VSA_EState6  | 152 | fr_amidine         | 204 | fr_thiazole       |
| 49 | PEOE_VSA12    | 101 | VSA_EState7  | 153 | fr_aniline         | 205 | fr_thiocyan       |
| 50 | PEOE_VSA13    | 102 | VSA_EState8  | 154 | fr_aryl_methyl     | 206 | fr_thiophene      |
| 51 | PEOE_VSA14    | 103 | VSA_EState9  | 155 | fr_azide           | 207 | fr_unbrch_alkane  |
| 52 |               |     |              |     |                    | 208 | fr_urea           |



## Supporting Figures

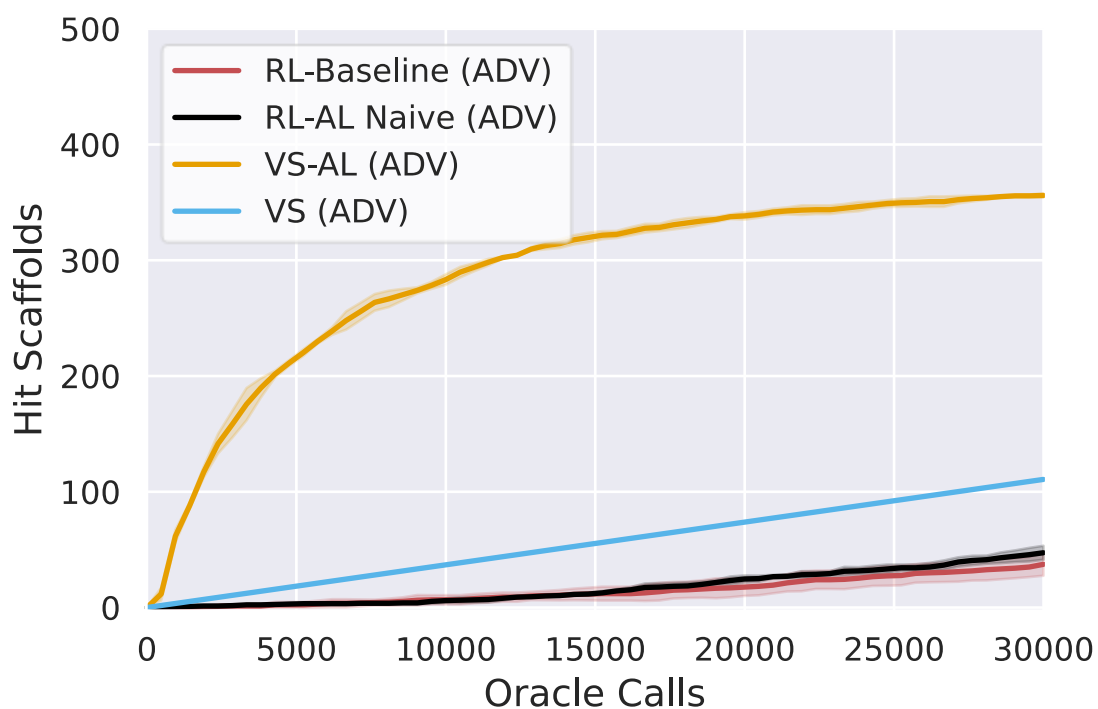

**Supporting Figure 1. Reinforcement Learning and Virtual Screen Hit Efficiency**

Line plot of reinforcement learning and virtual screening, with and without active learning intervention with number of hit scaffolds (Y axis) plotted against the number of calls to the oracle, AutoDock Vina (X axis). Mean of three trials shown as solid lines, with a single standard deviation shown as shaded outline.

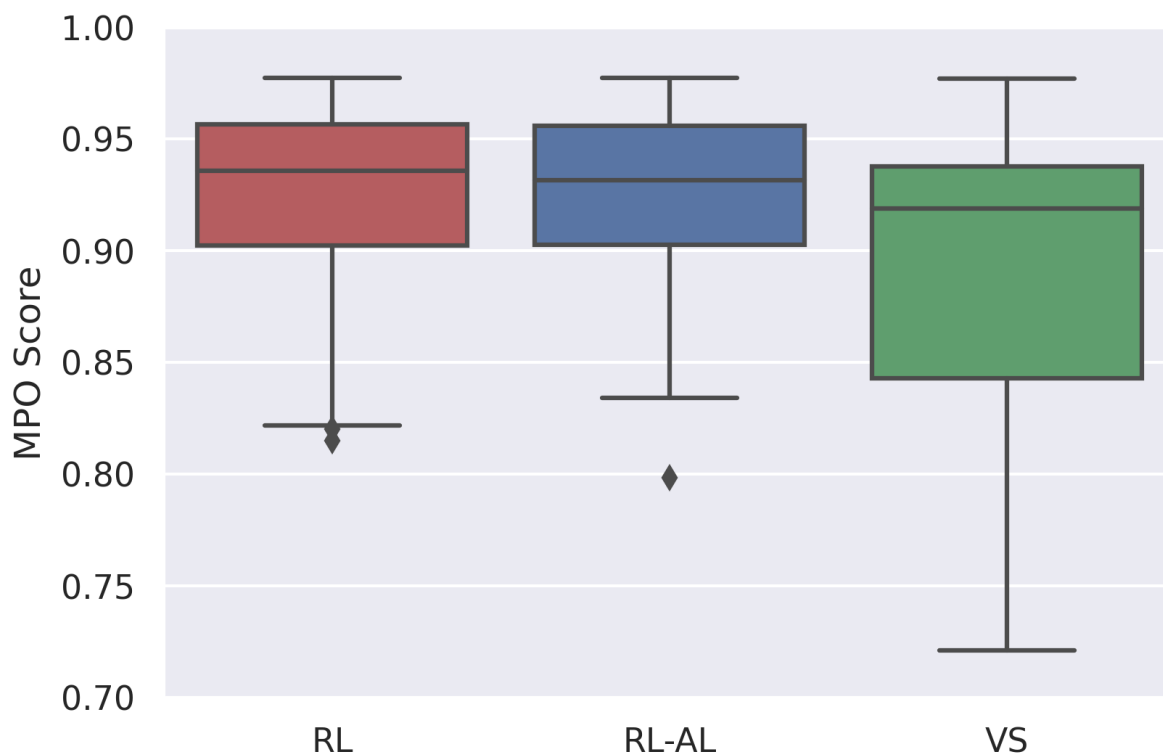

**Supporting Figure 2. Multi-parameter Score for RL, RL-AL, and VS.**

The MPO score was computed for all compounds with an oracle score greater than the native ligand. For all three sets of conditions (RL, RL-AL, and VS) the distribution of MPO scores shows similar medians, however the quartiles for the VS case indicate a greater variance in the distribution of scores. As the compounds for the VS come from REINVENT's prior, this indicates that compounds exist which are hits but also have unfavourable features, based on the selected score components. The presence of hits with unfavourable MPO scores is reduced in the RL and RL-AL. This figure was cropped for clarity, 7/6/18 datapoints for RL/RL-AL/VS were excluded, these datapoints were all given an MPO Score of 0 due to the custom alert component in the scoring function penalising specific structural motifs present in the compounds.

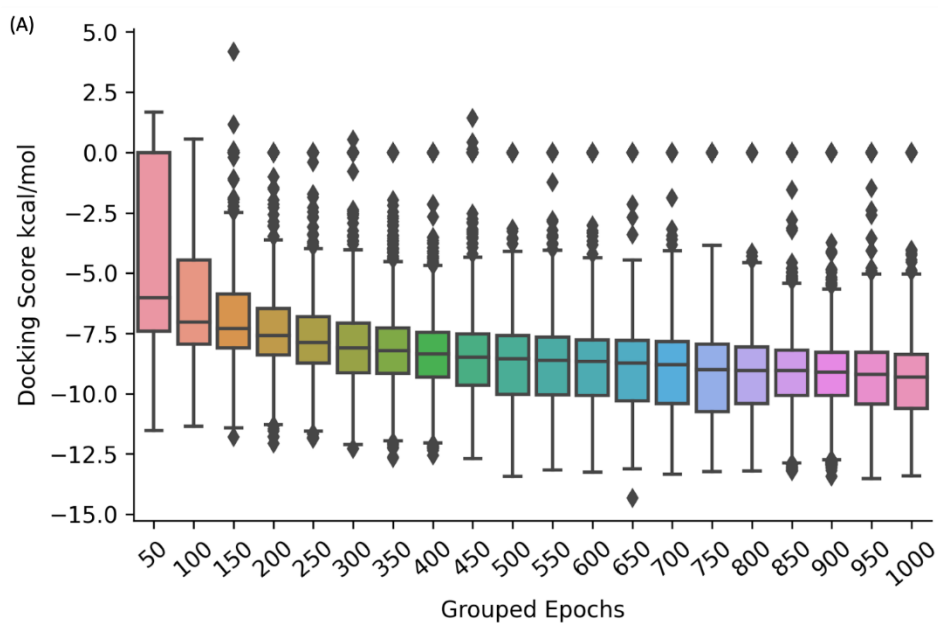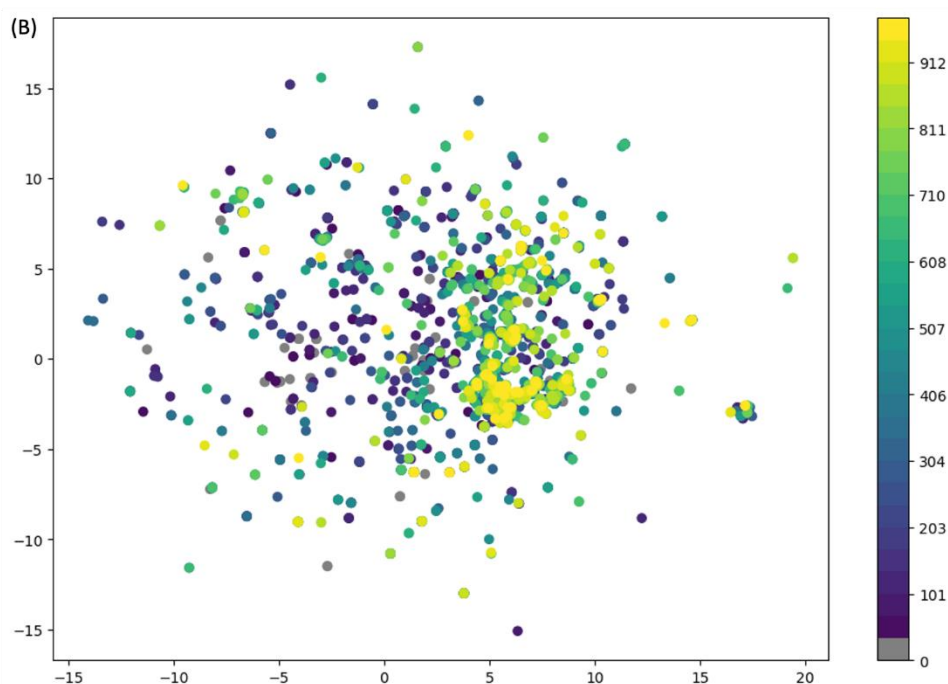

### Supporting Figure 3. Compound Score and Distribution with Training Epochs.

As the RL agent learns to optimise for high affinity binders there is an observable shift in the distribution of docking scores (A) and chemistry, displayed as UMAP (B), visualised here over 1000 epochs of reinforcement learning. UMAP produced using ECFP4 fingerprints, trained on 100,000 compounds sampled from the REINVENT prior and used to predict distribution of: 30 random compounds sampled from 100 epochs over 1000 epochs of REINVENT optimising for a design task with ADV.

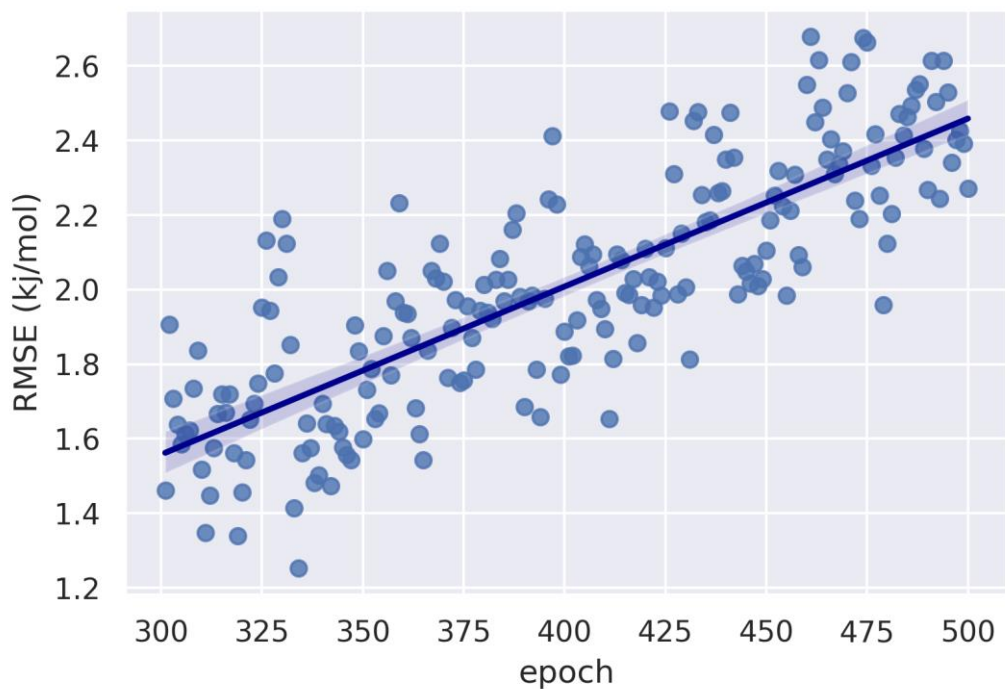

**Supporting Figure 4. Predictive Accuracy on Retrospective Data.**

A Random Forest model was trained on 300 epochs (38 400 compounds) of data from REINVENT. The predictive accuracy of the model (RMSE) was subsequently computed for the next 200 epochs of data (25 600 compounds). There is a decaying predictive accuracy as the run progresses indicating that future data is less represented in previous epochs.

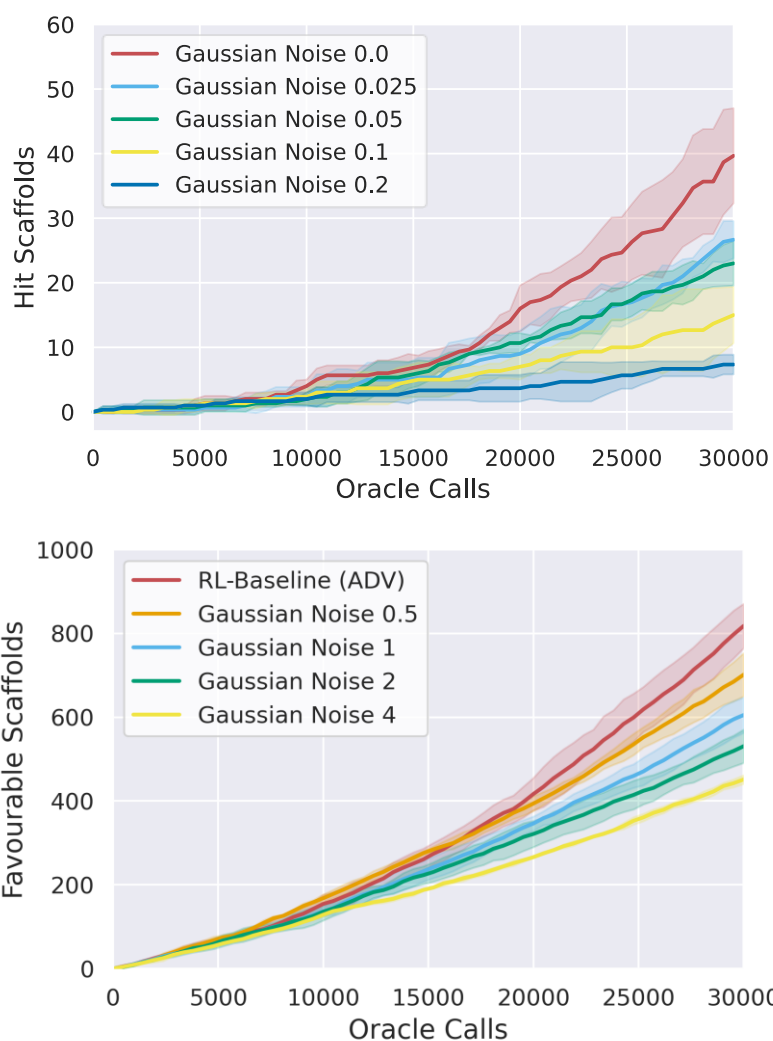

**Supporting Figure 5. Effect of Gaussian Noise on Run Productivity.**

Zero-centred Gaussian Noise is introduced into the oracle labels before computing the loss function. A clear effect is observed, with increasing quantities of noise delaying convergence to optimal solutions, as shown by the reduced number of hits in the high noise conditions (0.1, 0.2). The lowest quantity of Gaussian Noise (0.0) represents the baseline RL case. Upper figure ROCS Tanimoto Combo. Lower figure AutoDock-Vina docking score.

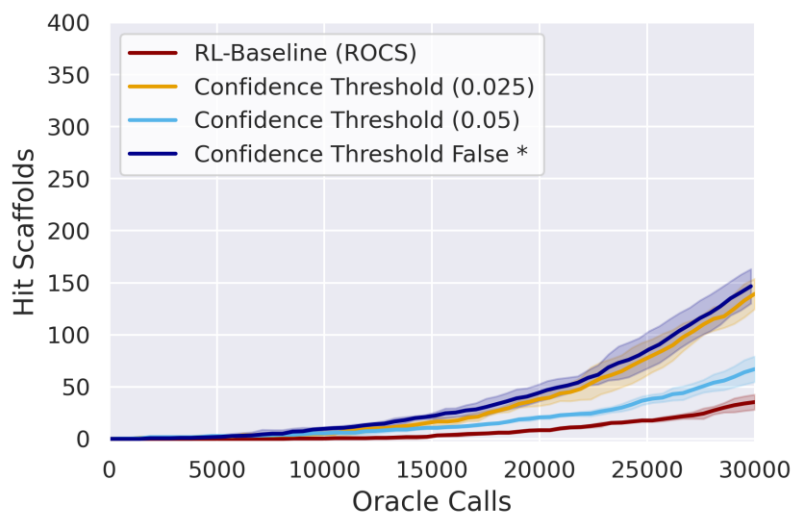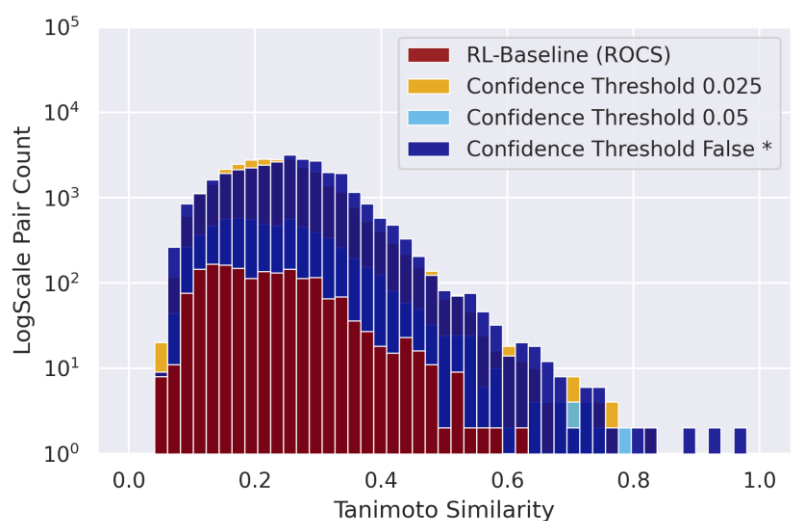

### Supporting Figure 6. Confidence Adapted Weights.

We modify the RL-AL baseline, such that predicted values are given a weight 0, 1, based on whether the model confidence is above or below the threshold value respectively. The weight defines the importance of a datapoint in calculating the RL loss function. A datapoint with a weight of 0 will not be used for computing the loss function, whereas a weight of 1 corresponds to a full update to the loss function. The lower confidence threshold improves RL-AL performance, indicating that predictions with a high uncertainty are antagonistic to hit finding.

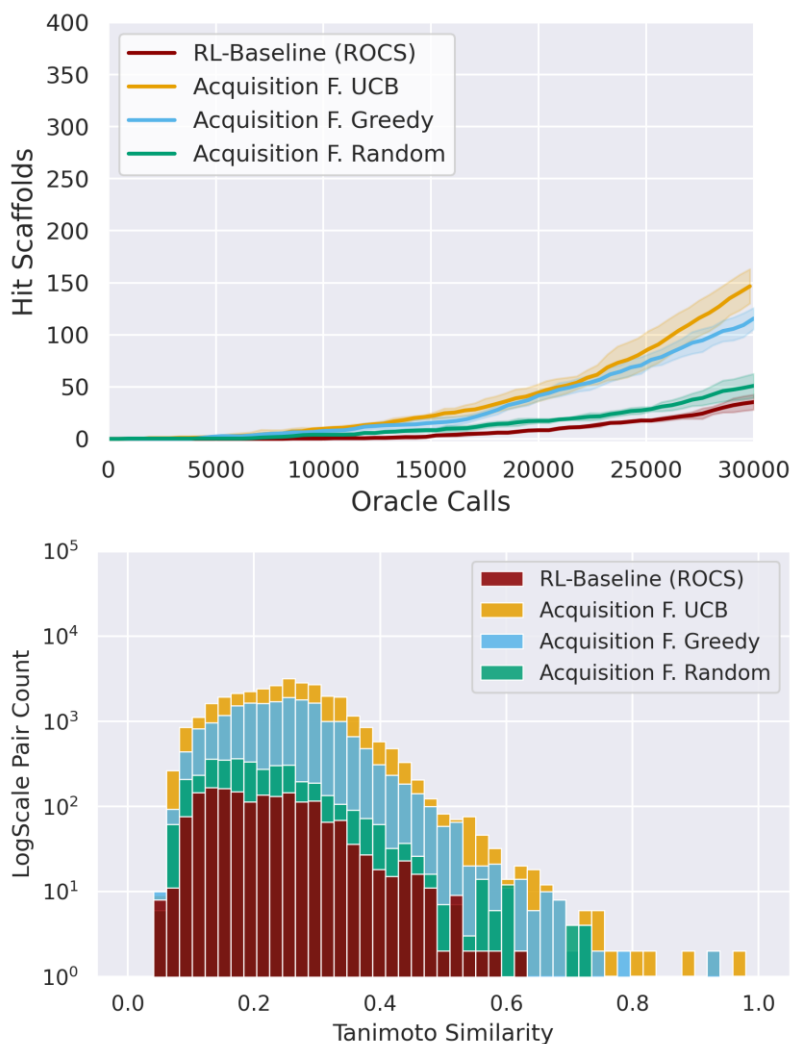

### Supporting Figure 7. Acquisition Strategies for RL-AL.

This figure compares two acquisition strategies, UCB (Upper Confidence Bound) and Greedy, for selecting compounds based on predicted labels. In contrast to the naïve case, which uses predicted scores for REINVENT policy updates, this case applies the insights from Figure 3.a., where predicted scores have no impact on RL policy updates/ UCB shows a marginally higher mean hit efficiency compared to the Greedy acquisition strategy, but the difference between them falls within one standard deviation, indicating that the performance of the two strategies is comparable.

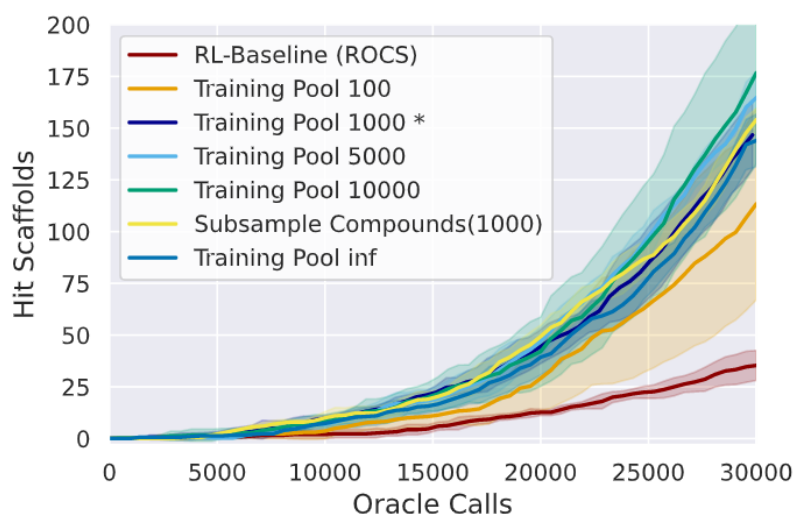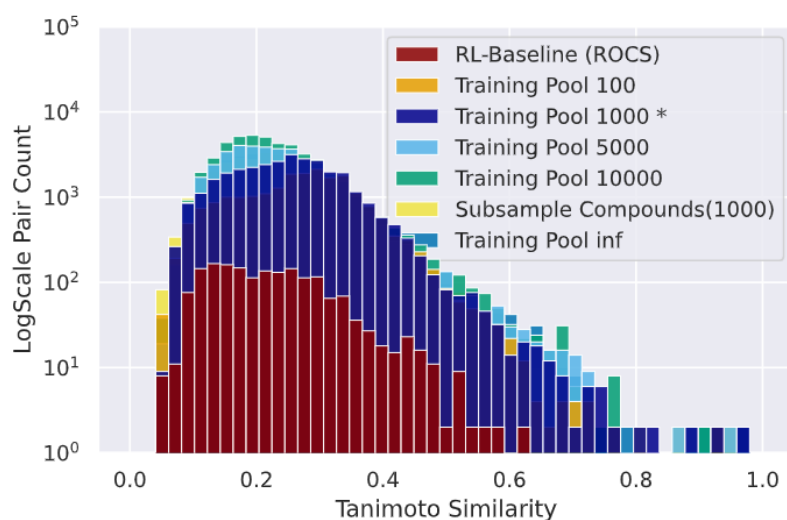

**Supporting Figure 8 Training Pool Manipulation.**

Top figure shows mean hits found across three replicates, with standard deviation shown in shaded region. Bottom figure shows the pairwise Tanimoto similarity distribution, cumulatively across three replicates. Each figure shows 6 different conditions, indicated by colour.



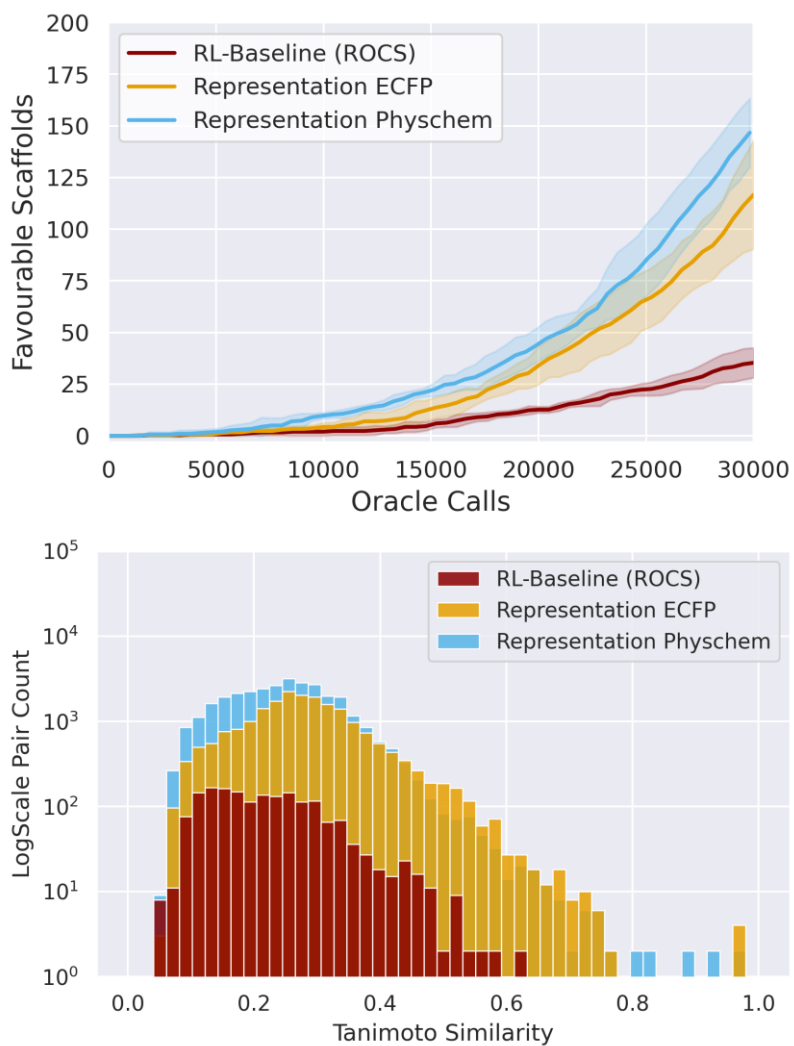

### Supporting Figure 9. Molecular Featurisation for RL-AL.

In this intervention we compare two different molecular representations for model training and prediction. Both ECFP and Physchem descriptors were implemented using RDKit. We see a low intervention difference between ECFP and Physiochemical descriptors, with physiochemical descriptors moderately outperforming ECFP at 30,000 oracle calls.

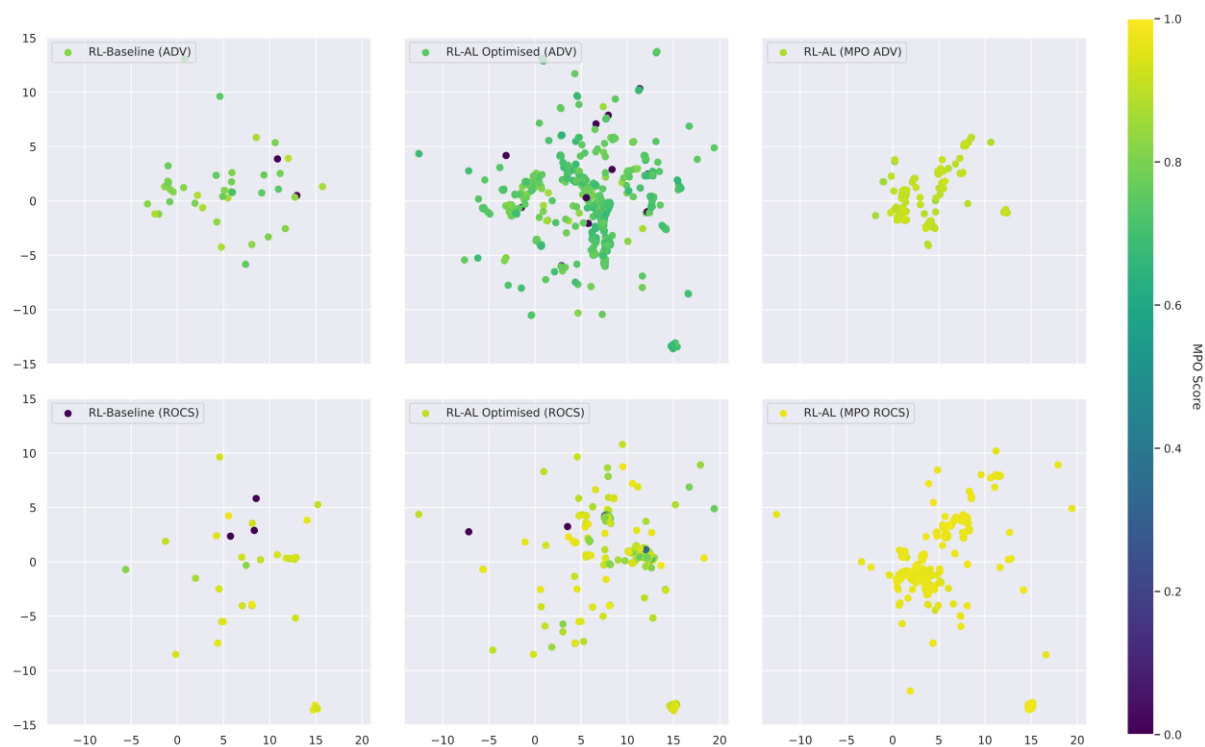

### Supporting Figure 10. UMAP of Hits for Optimised Conditions.

For ADV and ROCS, in the RL-Baseline, RL-AL Optimised, and RL-AL Optimised MPO cases (RL-AL MPO) we plot the predicted distribution of unique hit scaffolds. To predict the distribution, we use a UMAP model trained on 100 000 scaffolds generated from REINVENT's prior. Each UMAP represents a single replicate, to reduce figure over-crowding.

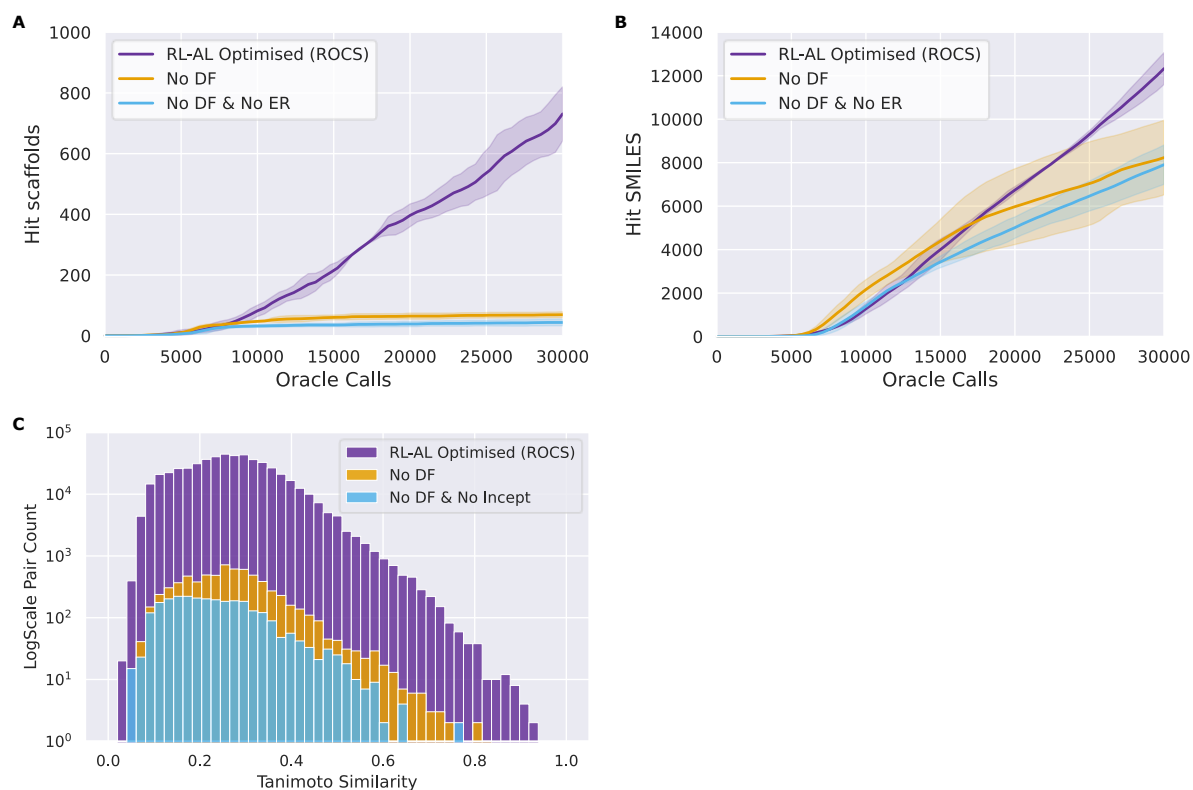

### Supporting Figure 11. Generation without Experience Replay and Diversity Filters

(A, B) Line plots showing hits identified over 30 000 oracle calls to a ROCS oracle with REINVENT under three conditions: RL-AL Optimised (purple), No DF (Yellow), and No DF or ER (Light blue), mean hits (across three replicates) shown as line with single standard deviation indicated by shading.(C) Pairwise Tanimoto distance frequency as a cumulative plot for all hit compounds generated across all conditions plotted on a log Y scale.

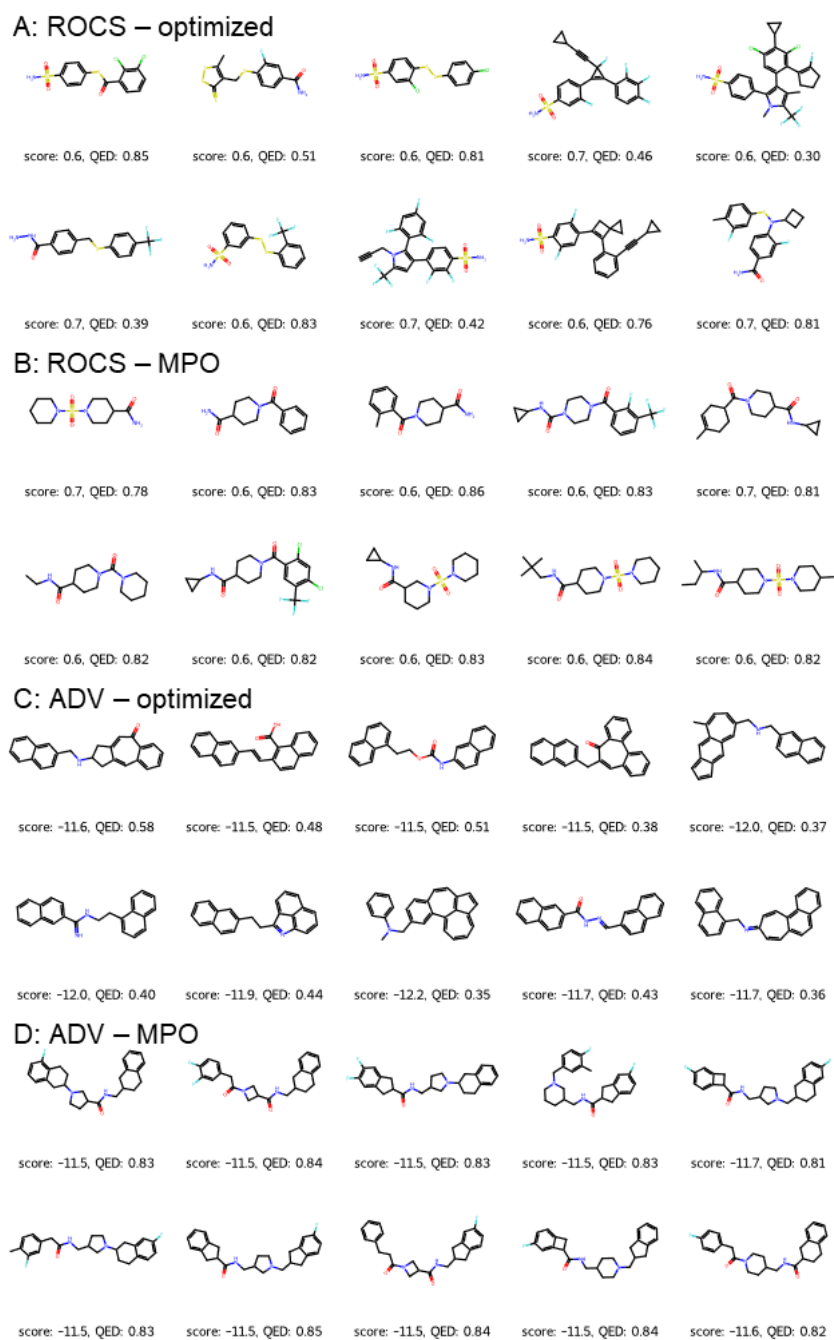

**Supporting Figure 12. Example structures generated by MPO-based and optimized RL-AL interventions.**

10 molecules selected at random from the top 100 scoring ideas based on the true oracle score, either ROCs (A&B) or ADV (C&D), for RL-AL with optimized parameters (A&C) or RL-AL with MPO-based scoring (B&D)

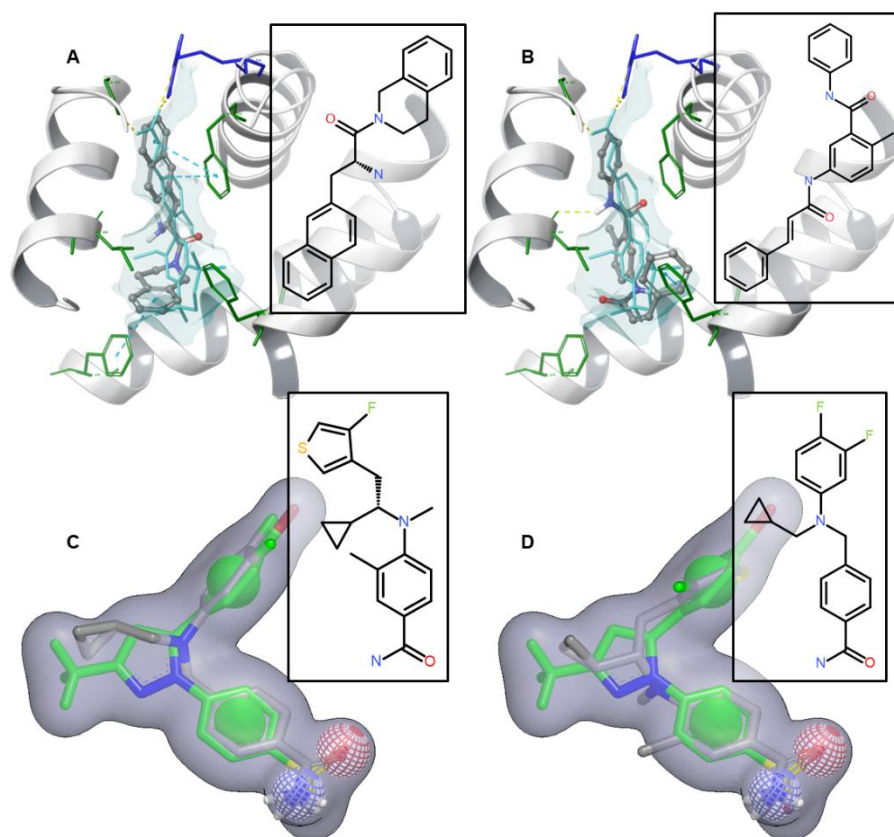

**Supporting Figure 13. Visualization of ROCs overlays and docked poses from RL-AL**

Top: Docked poses in the RXR $\alpha$  pocket based on PDB ID:7B88 in ball-and-stick representation for the two molecules with highest docking score (A: -11.93 kcal/mol and B: -11.65 kcal/mol) from ideas that also satisfy QED $\geq$ 0.6 as identified by RL-AL over three repeats. The RXR $\alpha$  protein is shown in cartoon view, with the binding pocket shaded and the native ligand (S99) indicated with a cyan stick representation, binding residues shown in stick representations from the top in clockwise order: ARG316 (Blue), PHE313 (green), PHE346 (green), PHE439 (green), ILE268 (green) and ALA327 (green). Bottom: ROCs overlays in a stick representation for the two molecules with highest ROCS scores (A: 0.83 and B:0.8) from ideas that also satisfy QED $\geq$ 0.6, as identified by RL-AL over three repeats. The representation is shown overlaid with a S85 query represented as a grey shape, with the SC-558 reference ligand in green. Colour atoms for the donor (red) and acceptor (blue) illustrated with spherical meshes. In all cases, 2D depictions of the generated molecules are provided as insets.

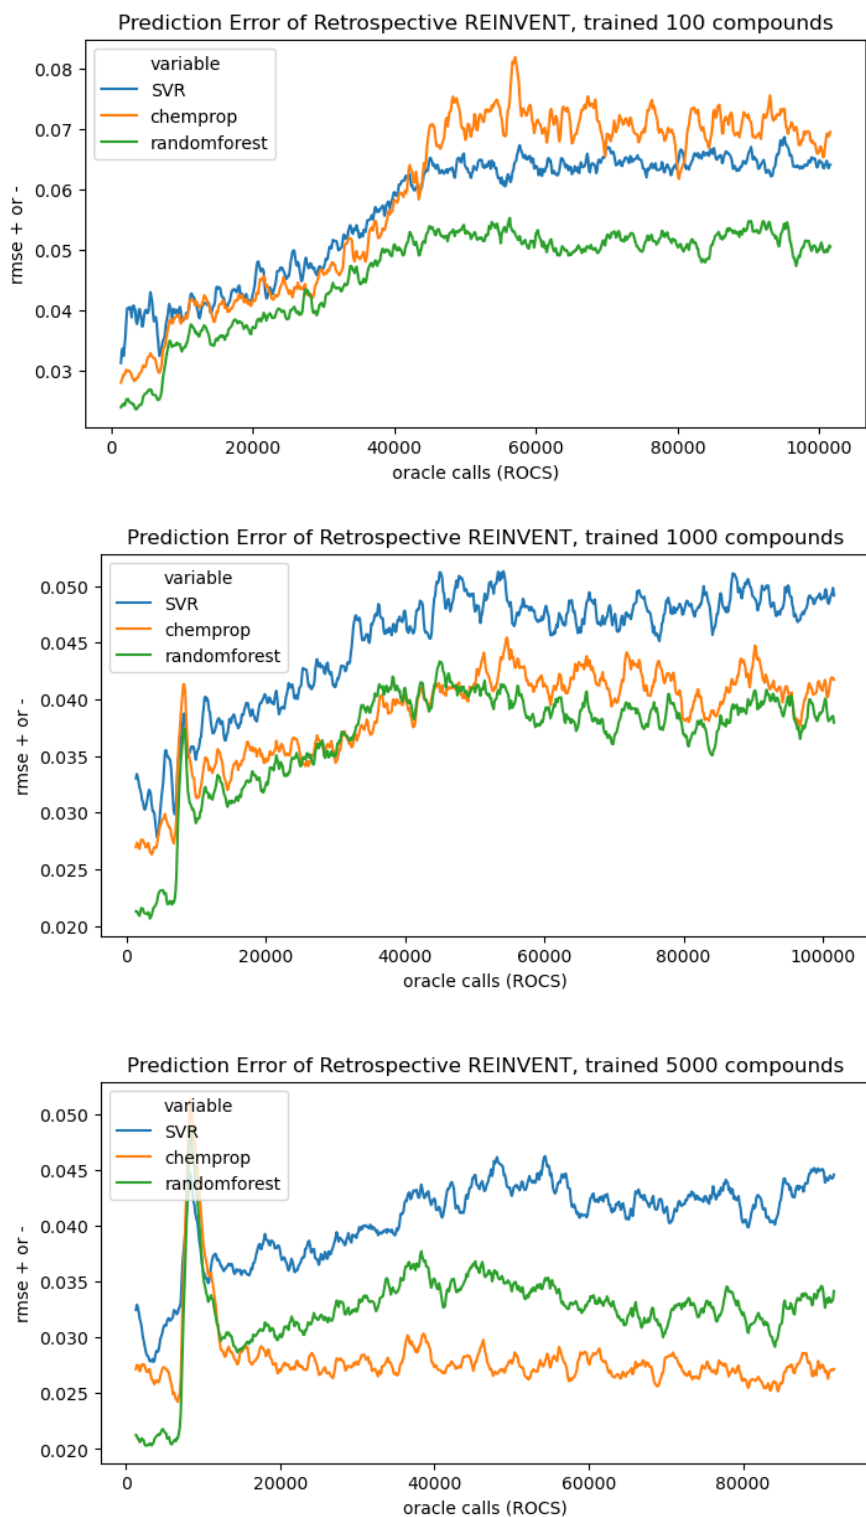

### Supporting Figure 14 Model Error with Retrospective RL.

For each model, the training pool consisted of the previous 100, 1 000, or 5 000 compounds generated by the RL run. Surrogate predictions were not used to update the agent, but were used to compute the model error (RMSE) on the next epoch. With 5 000 compounds

ChemProp is the superior model, with the lowest predictive error. With 100 and 1 000 compounds Random Forest had better than and equal to performance with ChemProp. SVR never performed better than RF regardless of training data.

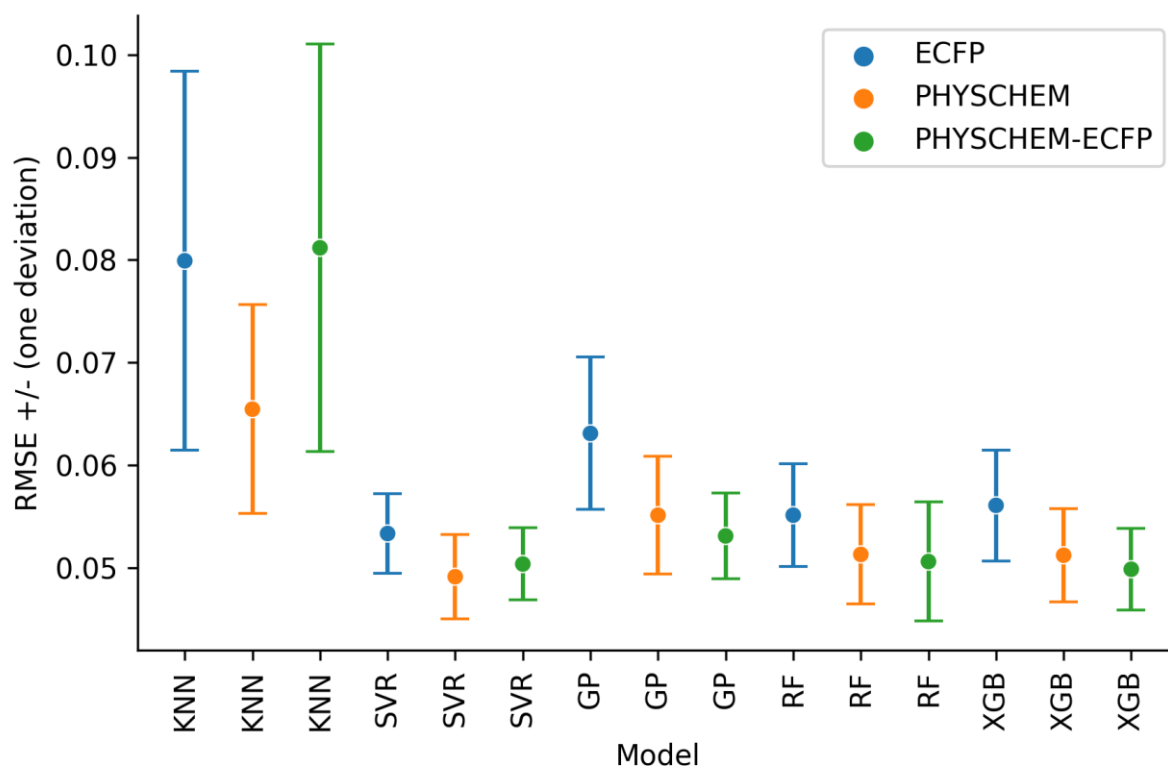

**Supporting Figure 15. Model and Fingerprint Cross-validation.**

Best hyperparameters were selected by grid-search on 1 000 compounds sampled from eight equally spaced epochs: 100, 200, 300, 400, 500, 600, 700, 800 subsets of data.



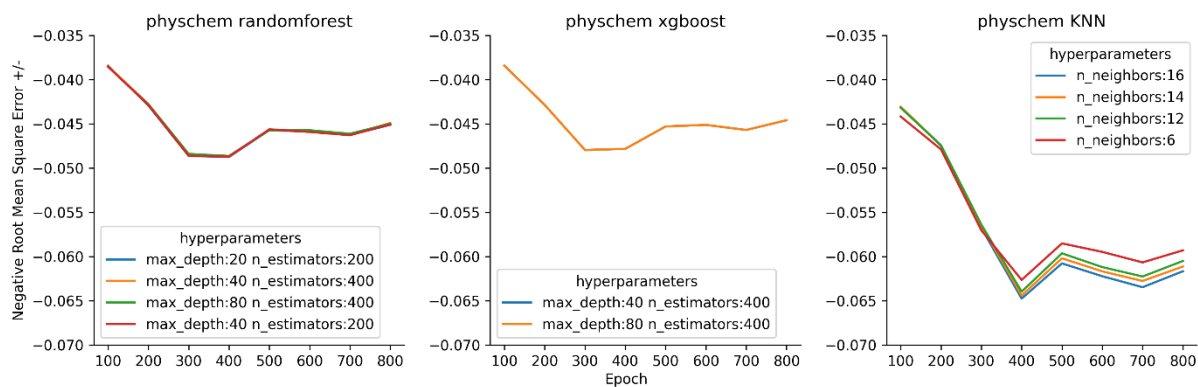

**Supporting Figure 16. Hyperparameter stability comparison.**

Three classic machine learning models were trained using five-fold cross-validation on 8 subsets of data (1000 compounds) taken from equally spaced points during a REINVENT run. Each line represents a set of hyperparameters that produced the lowest RMSE on any one of the subsets of data.

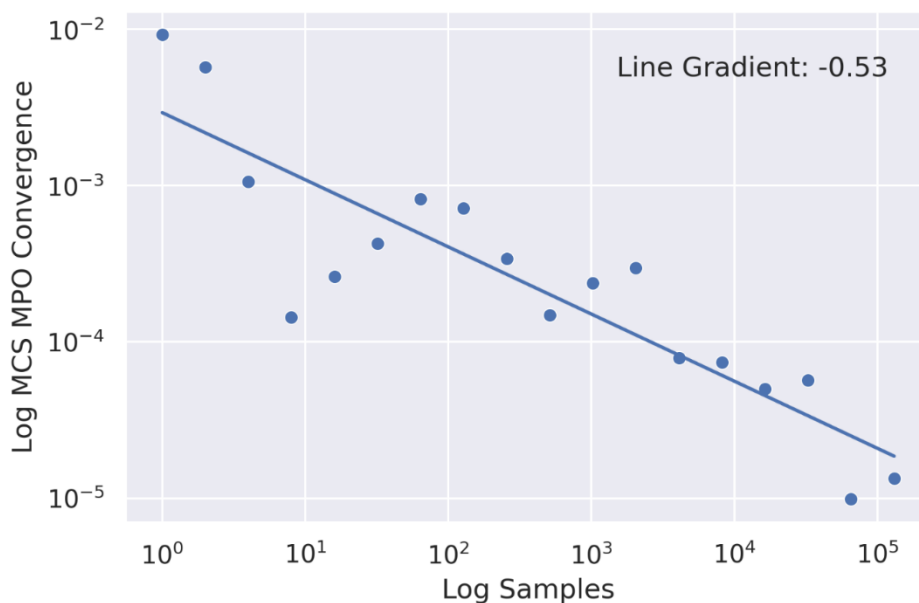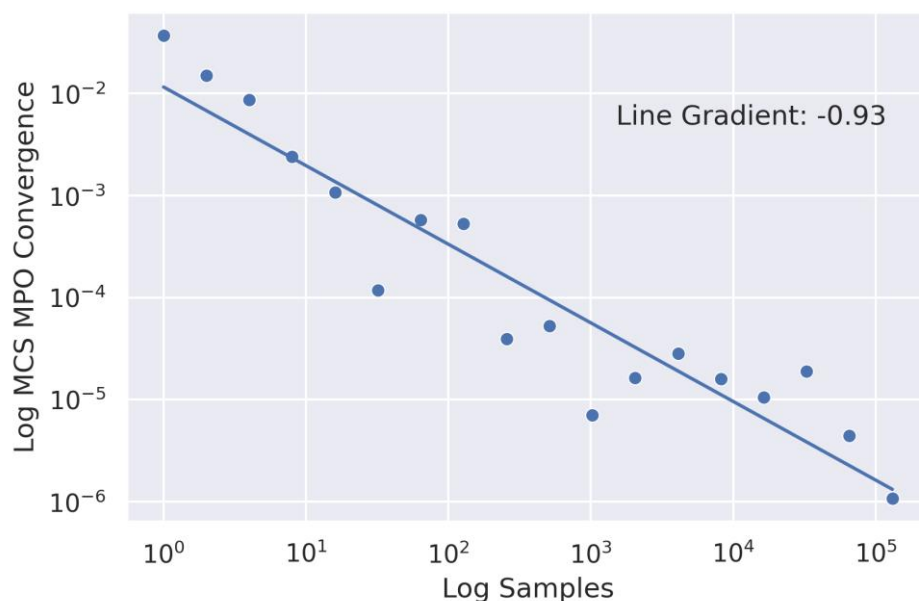

**Supporting Figure 17. Sampling Size Dependent MPO Convergence.**

We use Monte-Carlo sampling to estimate the transformed distribution of values for all non-deterministic score components for 100 compounds generated by REINVENT. We use the sampled values for the non-deterministic score components to compute the geometric mean of all score components, providing a final transformed distribution. This figure shows the relationship between sample size and the true value, defined as  $\frac{\tilde{E}(MPO) - \tilde{E}(MPO)_{640000}}{\tilde{E}(MPO)_{640000}}$ , where  $\tilde{E}$  represents the expected value of the distribution of the *MPO*.

## References

- 1 Chen, T. *et al.* Xgboost: extreme gradient boosting. *R package version 0.4-2* **1**, 1-4 (2015).
- 2 Fix, E. & Hodges, J. L. Discriminatory Analysis. Nonparametric Discrimination: Consistency Properties. *International Statistical Review / Revue Internationale de Statistique* **57**, 238-247 (1989). <https://doi.org/10.2307/1403797>
- 3 Vapnik, V. *The nature of statistical learning theory*. (Springer science & business media, 1999).
- 4 Rasmussen, C. E. in *Advanced Lectures on Machine Learning: ML Summer Schools 2003, Canberra, Australia, February 2 - 14, 2003, Tübingen, Germany, August 4 - 16, 2003, Revised Lectures* (eds Olivier Bousquet, Ulrike von Luxburg, & Gunnar Rätsch) 63-71 (Springer Berlin Heidelberg, 2004).
- 5 Pedregosa, F. *et al.* Scikit-learn: Machine learning in Python. *the Journal of machine Learning research* **12**, 2825-2830 (2011).
- 6 Yang, K. *et al.* Analyzing Learned Molecular Representations for Property Prediction. *Journal of Chemical Information and Modeling* **59**, 3370-3388 (2019). <https://doi.org/10.1021/acs.jcim.9b00237>
- 7 McInnes, L., Healy, J. & Melville, J. Umap: Uniform manifold approximation and projection for dimension reduction. *arXiv preprint arXiv:1802.03426* (2018).
- 8 Wen Y, L. Z., Xiang Y, Reker D. Improving Molecular Machine Learning Through Adaptive Subsampling with Active Learning. *ChemRxiv* ( 2023). <https://doi.org/10.26434/chemrxiv-2023-h8905>
